# Supplementary material for: Comparison of two area-level socioeconomic deprivation indices: Implications for public health research, practice, and policy
Source: PLOS journal article supplement (doi:10.1371/journal.pone.0292281), 2023-10-05
Supplement: S3 (10.1371/journal.pone.0292281.s003) [file journal.pone.0292281.s003]

**Figure S3. Example Locations of Tracts with Poor ADI-SVI Agreement, Comparisons 2b & 3b<sup>a</sup>**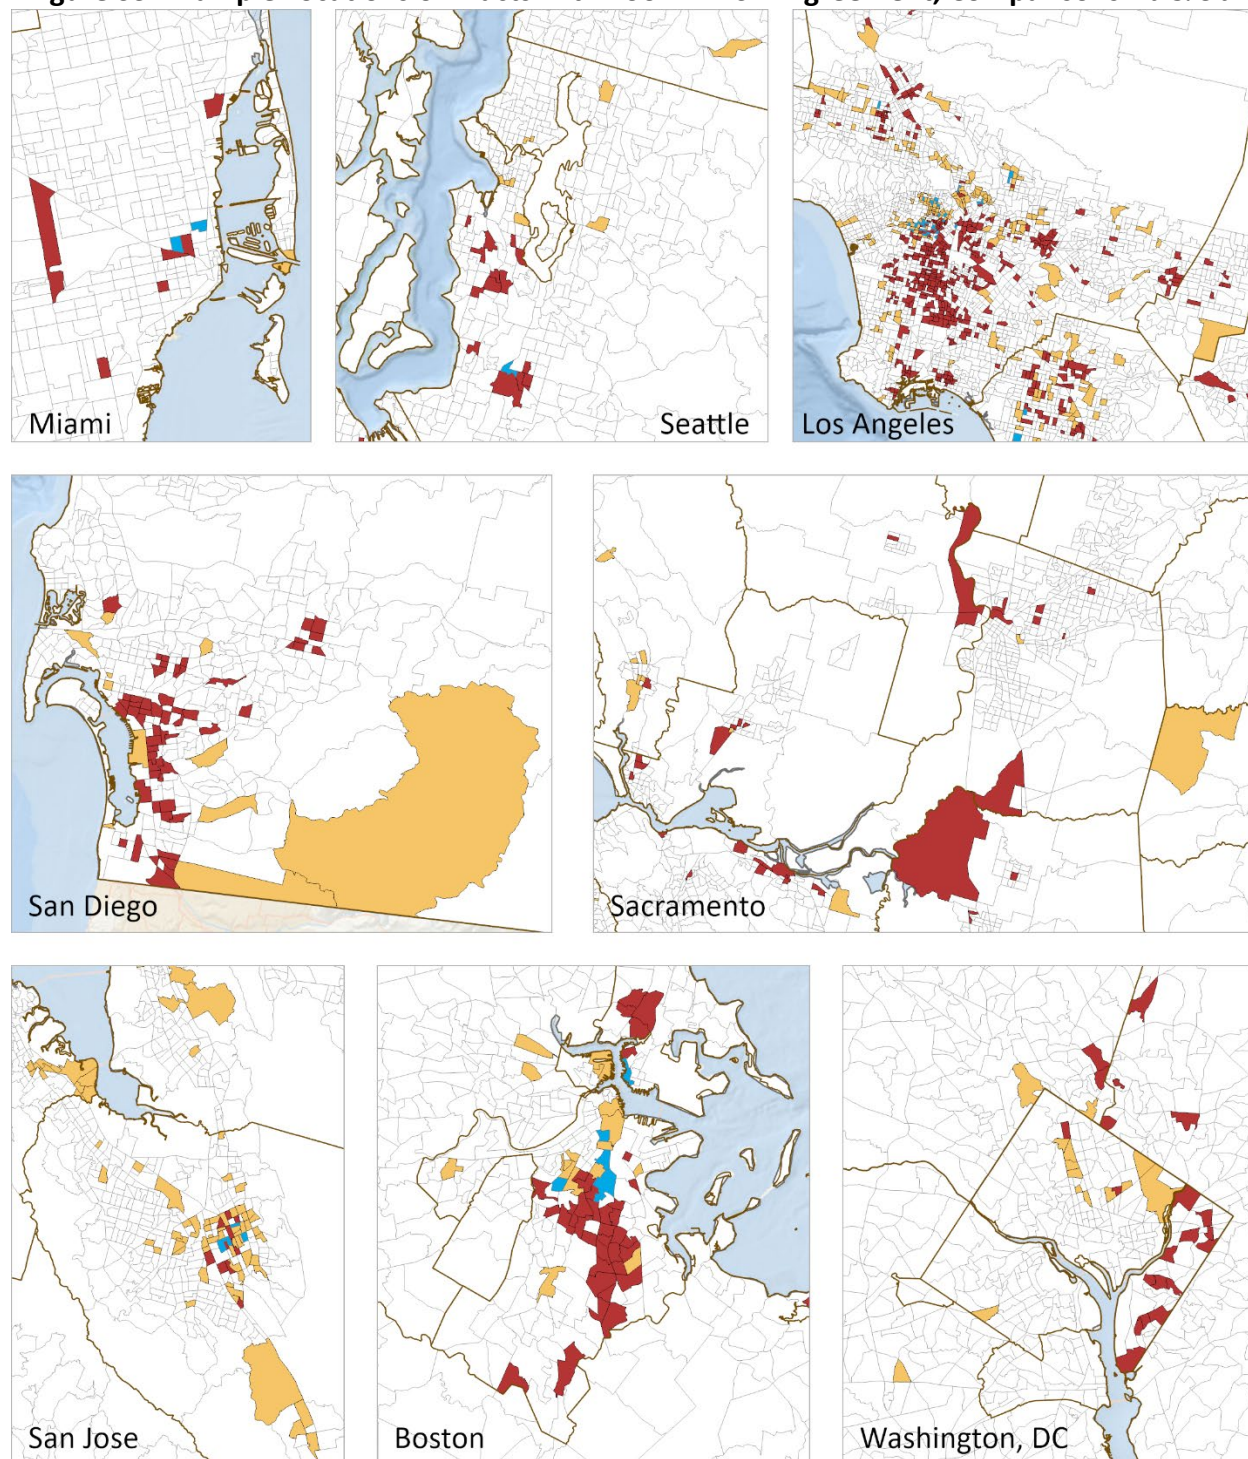

Tracts with Poor ADI-SVI Agreement

**2-3b** Very poor agreement  
Lowest ADI (10%),  
Highest SVI (10%)

**2b** Poor agreement  
High SVI (10%),  
Low ADI (40%)

**3b** Poor agreement  
Low ADI (10%),  
High SVI (40%)

Abbreviations: ADI, area deprivation index; SVI, social vulnerability index.

<sup>a</sup> = Poor index agreement was defined by ADI and SVI index scores that differed by at least 6 deciles.

<sup>b</sup> = 2b. and 3b. refer to Figure 3 comparisons of tracts with poor index agreement.

Data sources: 2010 U.S. Census TIGER/Line shapefiles: state and census tract; 2019 ADI [1]; 2018 SVI [2]; Basemap: Content is the intellectual property of Esri and is used herein with permission. Copyright © 2023 Esri and its licensors. All rights reserved.
