# Supplementary material for: Comparison of two area-level socioeconomic deprivation indices: Implications for public health research, practice, and policy
Source: PLOS journal article supplement (doi:10.1371/journal.pone.0292281), 2023-10-05
Supplement: S14 (10.1371/journal.pone.0292281.s014) [file journal.pone.0292281.s014]

## Supporting Information References

1. Center for Health Disparities Research. Neighborhood Atlas: University of Wisconsin School of Medicine and Public Health; 2022 [December 15, 2022]. Available from: <https://www.neighborhoodatlas.medicine.wisc.edu>.
2. Agency for Toxic Substances and Disease Registry, Centers for Disease Control and Prevention. CDC SVI 2018 Documentation 2022 [December 15, 2022]. Available from: <https://www.atsdr.cdc.gov/placeandhealth/svi>.
3. Srivastava T, Schmidt H, Sadecki E, Kornides ML. Disadvantage indices deployed to promote equitable allocation of COVID-19 vaccines in the US: A scoping review of differences and similarities in design. *JAMA Health Forum*. 2022;3(1):e214501-e. doi: jamahealthforum.2021.4501.
4. Singh GK. Area deprivation and widening inequalities in US mortality, 1969–1998. *American Journal of Public Health*. 2003;93(7):1137-43. doi: 10.2105/AJPH.93.7.1137.
5. Kind AJ, Jencks S, Brock J, Yu M, Bartels C, Ehlenbach W, et al. Neighborhood socioeconomic disadvantage and 30 day rehospitalizations: An analysis of Medicare data. *Annals of Internal Medicine*. 2014;161(11):765. doi: 10.7326/M13-2946.
6. Park C, Schappe T, Peskoe S, Mohottige D, Chan NW, Bhavsar NA, et al. A comparison of deprivation indices and application to transplant populations. *American Journal of Transplantation*. 2023. doi: 10.1016/j.ajt.2022.11.018.
